# Supplementary material for: Technological Devices and Their Effect on Preschool Children’s Eating Habits in Communities of Mixed Socioeconomic Status in Istanbul; a Pilot Cross-Sectional Study
Source: MDPI journal article supplement (doi:10.3390/bs11110157), 2021-11-15
Supplement: s1 [file s1]

---

**Supplementary Material**

---

**Table S1.** Community Demographic Characteristics.

| <b>Demographics</b>                     | <b>n</b> | <b>%</b> |
|-----------------------------------------|----------|----------|
| <b><i>Parental/Guardian Role:</i></b>   |          |          |
| Mother                                  | 96       | 92.3     |
| Father                                  | 5        | 4.8      |
| Grandmother/grandfather                 | 3        | 2.9      |
| <b><i>Parent's Age (years):</i></b>     |          |          |
| 21-30                                   | 21       | 20.2     |
| 31-40                                   | 74       | 71.2     |
| 41-50                                   | 6        | 5.8      |
| 51-60                                   | 1        | 1.0      |
| 60+                                     | 2        | 1.9      |
| <b><i>Mother's Education level:</i></b> |          |          |
| Literate                                | 1        | 1.0      |
| Primary school                          | 2        | 1.9      |
| Middle school                           | 5        | 4.8      |
| High school                             | 42       | 40.4     |
| University                              | 47       | 45.2     |
| Postgraduate                            | 7        | 6.7      |
| <b><i>Father's Education level:</i></b> |          |          |
| Literate                                | 1        | 1.0      |
| Primary school                          | 4        | 3.8      |
| Middle school                           | 12       | 11.5     |
| High school                             | 34       | 32.7     |
| University                              | 44       | 42.3     |
| Postgraduate                            | 9        | 8.7      |
| <b><i>Mother employed</i></b>           |          |          |
| Yes                                     | 80       | 76.9     |
| No                                      | 24       | 23.1     |
| <b><i>Father employed</i></b>           |          |          |
| Yes                                     | 104      | 100.0    |
| No                                      | 0        | 0.0      |

---
